1 **Expression of Spred2 in the urothelial tumorigenesis of**  
2 **the urinary bladder**

3

4 Shinsuke Oda<sup>1</sup>, Masayoshi Fujisawa<sup>1</sup>, Li Chunning<sup>1</sup>, Toshihiro Ito<sup>2</sup>, Takahiro  
5 Yamaguchi<sup>1</sup>, Teizo Yoshimura<sup>1</sup>, and Akihiro Matsukawa<sup>1\*</sup>

6

7 <sup>1</sup>Department of Pathology and Experimental Medicine, Graduate School of Medicine,  
8 Dentistry and Pharmaceutical Sciences, Okayama University, Okayama, 700-8558, Japan.

9 <sup>2</sup>Department of Immunology, Nara Medical University, Kashihara, 634-8521, Japan.

10

11 Short title: Spred2 in the urothelial tumorigenesis

12

13 \*Corresponding author:

14 Akihiro Matsukawa, M.D., Ph.D.

15 Department of Pathology and Experimental Medicine, Graduate School of Medicine,  
16 Dentistry and Pharmaceutical Sciences, Okayama University

17 2-5-1 Shikata, Kita-ku, Okayama 700-8558, Japan

18 TEL +81-86-235-7141

19 FAX +81-86-235-7148

20 E-mail: [amatsu@md.okayama-u.ac.jp](mailto:amatsu@md.okayama-u.ac.jp)

21

## 22 **Abstract**

23 Aberrant activation of the Ras/Raf/ERK (extracellular-signal-regulated kinase)-MAPK  
24 (mitogen-activated protein kinase) pathway is involved in the progression of cancer,  
25 including urothelial carcinoma; but the negative regulation remains unclear. In the present  
26 study, we investigated pathological expression of Spred2 (Sprouty-related EVH1 domain-  
27 containing protein 2), a negative regulator of the Ras/Raf/ERK-MAPK pathway, and the  
28 relation to ERK activation and Ki67 index in various categories of 275 urothelial tumors  
29 obtained from clinical patients. In situ hybridization demonstrated that Spred2 mRNA  
30 was highly expressed in high-grade non-invasive papillary urothelial carcinoma  
31 (HGPUC), and the expression was decreased in carcinoma in situ (CIS) and infiltrating  
32 urothelial carcinoma (IUC). Immunohistochemically, membranous Spred2 expression,  
33 important to interact with Ras/Raf, was preferentially found in HGPUC. Interestingly,  
34 membranous Spred2 expression was decreased in CIS and IUC relative to HGPUC, while  
35 ERK activation and the expression of the cell proliferation marker Ki67 index were  
36 increased. HGPUC with membranous Spred2 expression correlated significantly with  
37 lower levels of ERK activation and Ki67 index as compared to those with negative Spred2  
38 expression. Thus, our pathological findings suggest that Spred2 negatively regulates  
39 cancer progression in non-invasive papillary carcinoma possibly through inhibiting the  
40 Ras/Raf/ERK-MAPK pathway, but this regulatory mechanism is lost in cancers with high  
41 malignancy. Spred2 appears to be a key regulator in the progression of non-invasive  
42 bladder carcinoma.

43

## 44 **Introduction**

45 Bladder cancer is a highly prevalent disease and its incidence is steadily rising worldwide  
46 [1]. In the United States, bladder cancer is the 4th most incident and 8th most deadly  
47 tumor among men [2]. Most of the bladder cancer is urothelial carcinoma arising from  
48 urothelial epithelium. Evidence indicates that urothelial carcinoma has two distinct  
49 clinical subtypes with distinct molecular features at bladder tumor initiation; low-grade  
50 tumors (superficial papillary) and high-grade tumors (flat, represented by carcinoma in  
51 situ) [3, 4]. Low-grade tumors, i.e., papillary urothelial neoplasm of low malignant  
52 potential or low-grade papillary urothelial carcinoma, do not easily progress to high-grade  
53 papillary urothelial carcinoma or invasive carcinoma [5, 6]. Recently, a comprehensive  
54 landscape of molecular alterations in urothelial carcinomas was shown [7]. More than  
55 70% of low-grade papillary carcinomas harbor FGFR3 gene mutation [8]. On the other  
56 hand, flat carcinoma in situ (CIS) often develops to invasive urothelial carcinoma [9, 10],  
57 in which allelic deletion of the *p53* and *PTEN* (tumor-suppressor) [11] and *retinoblastoma*  
58 gene (RB, negative cell cycle regulator) [12] is common.

59 In addition to the gain of function gene mutations, extracellular-regulated kinase  
60 (ERK) plays a crucial role in cancer development and progression [13, 14]. The  
61 Ras/Raf/ERK-MAPK (mitogen-activated protein kinase) pathway, one of the  
62 serine/threonine kinases of MAPKs pathway, is a major determinant to promote cell  
63 proliferation, differentiation, and survival, and plays an important role in bladder cancer  
64 prognosis [15]. ERK activation was observed in high-grade non-invasive and invasive  
65 urothelial carcinoma [16], suggesting that robust ERK activation contributes to urothelial  
66 tumorigenesis with a high malignant potential.

67 Signaling pathways are counterbalanced by endogenous inhibitory mechanism(s).  
68 Spred2 (Sprouty-related, EVH1 domain-containing protein 2) inhibits Ras-dependent  
69 ERK signaling by suppressing the phosphorylation and activation of Raf [17]. Ras  
70 activation is aberrant in many tumors due to oncogenic mutation of the *Ras* genes or  
71 alterations in upstream signaling components [18]. Rational therapies that target the  
72 Ras/Raf/ERK-MAPK pathway continues to attract much attention for cancer therapy [19].

73 We have hitherto investigated in different types of murine models and found that Spred2  
74 controls inflammation by down-regulating the Ras/Raf/ERK-MAPK pathway [20–29].  
75 Interestingly, Spred2 expression is down-regulated in invasive carcinomas such as  
76 hepatocellular carcinoma [30, 31] and prostatic adenocarcinoma [32]. Thus, altered  
77 Spred2 expression could affect urothelial tumorigenesis by regulating the Ras/Raf/ERK-  
78 MAPK pathway in bladder cancer. However; the pathophysiological roles of Spred2 in  
79 bladder cancer tumorigenesis remain largely unknown. In the present study, we examined  
80 the mRNA and protein expression of Spred2 in a range of human urothelial tumors. Our  
81 present findings suggest that endogenous Spred2 affects urothelial cancer progression,  
82 especially in non-invasive papillary urothelial carcinoma.

83

## 84 **Materials and methods**

### 85 **Clinical samples**

86 A total of 275 bladder biopsy or resection specimens (transurethral resection and  
87 cystectomy) during the year 2001-2016 were retrieved from pathology record at  
88 Department of Pathology, Okayama University Hospital. The patients who underwent  
89 chemotherapy or radiotherapy before the resection were not included in this study. All  
90 the hematoxylin and eosin (HE)-stained sections were reviewed and categorized by two  
91 blinded pathologists according to the 2016 WHO classification: non-tumor urothelium  
92 (non-tumor), papillary urothelial neoplasm of low malignant potential (PUNLMP), low-  
93 grade papillary urothelial carcinoma (LGPUC), high-grade papillary urothelial carcinoma  
94 (HGPUC), carcinoma in situ (CIS), and infiltrating urothelial carcinoma (IUC). All  
95 sections were used for immunohistochemistry. For in situ hybridization, sections were  
96 randomly chosen from each category. Cases for the enrolled 275 patients were shown in  
97 Table 1, in which clinicopathological features of each category were noted.

98 The protocol in this study was reviewed and approved by the *Ethics Committee*,  
99 *Okayama University Graduate School of Medicine, Dentistry and Pharmaceutical*  
100 *Sciences and Okayama University Hospital (1608-009)*. Informed consent was obtained  
101 in the form of opt-out on our website. Those who rejected were excluded. This consent

102 procedure conformed to amended Ethical Guidelines for Clinical Studies provided by  
103 Ministry of Health, Labor and Welfare of Japan (May 31, 2015) was approved by the  
104 *Ethics Committee, Okayama University Graduate School of Medicine, Dentistry and*  
105 *Pharmaceutical Sciences and Okayama University Hospital.*

106

### 107 **In situ hybridization**

108 A total of 85 samples were randomly selected from 275 samples (Table 1). Paraffin-  
109 embedded tissue samples were sectioned at 5- $\mu$ m-thick, kept on glass slides overnight at  
110 45°C and then in situ hybridization was performed using the Affymetrix ViewRNA ISH  
111 Tissue Assay kit (QVT0050) and ViewRNA Chromogenic Signal Amplification kit  
112 (QVT0200) (Thermo Fisher Scientific, MA, USA), according to the manufacturer's  
113 instructions. Human Spred2 probe set was purchased from Thermo Fisher (Affymetrix,  
114 Catalog No. VA1-17417-01). Spred2 mRNA expression was stained in red-dot. The total  
115 number of red-dot in 100 cells was counted in each sample under microscope by two  
116 blinded pathologists, and the number of red-dot per cell was calculated.

117

### 118 **Immunohistochemistry**

119 For immunohistochemistry, all 275 specimens were employed (Table 1). Immunostaining  
120 for Spred2 was carried out using the Polink-2 plus HRP rabbit with DAB kit (GIBCO, Bothell,  
121 WA, USA), according to the manufacturer's instructions. In brief, sections (4- $\mu$ -thick)  
122 were treated by microwave oven in 0.1 M citric acid buffer, treated with 3% $H_2O_2$  in  
123 methanol, blocked with DAKO Protein Block Serum-Free (Dako, Carpinteria, CA, USA),  
124 and incubated with anti-human Spred2 polyclonal antibody (Proteintech, Rosemont, IL,  
125 USA). Sections were then incubated with rabbit antibody specific enhancer, followed by  
126 the addition of polymer-HRP for rabbit IgG, and visualized using DAB complex. Nuclear  
127 counterstaining was performed using hematoxylin. Immunostaining for pERK1/2 (Clone  
128 D13.14.4E, Cell Signaling Technology, Danvers, MA, USA) and Ki67 (Clone MIB-1,  
129 Dako) was performed on a Ventana Discovery XT automated stainer (Ventana, Tucson,  
130 AZ, USA) with using iVIEW DAB Detection Kit (Ventana).

131

## 132 **Evaluation of immunohistochemistry**

133 Spred2 was stained in the cytoplasm (C) or/and membrane (M). Immunoreactivity for  
134 Spred2 was classified into 4 groups, according to subcellular localization and staining  
135 intensity; C-M-, absent or weak staining intensity in cytoplasm and membrane; C-M+,  
136 moderate to strong membranous staining without staining in cytoplasm; C+M-, moderate  
137 to strong cytoplasmic staining without membranous staining; C+M+, moderate to strong  
138 cytoplasmic and membranous staining. pERK immunostaining was scored on the  
139 following semiquantitative scale as previously reported with modifications [33]: no  
140 staining (0); focal to <10% of cells (1); 10-50% of cells (2); 50% or more cells stained  
141 weak (3); 10-50% stained strong (4); 50% or more stained strong (5). Ki67 index, a  
142 marker for cell proliferation, was determined by counting 500 tumor cells, and the  
143 percentages of positively stained cells were determined. The stained sections were  
144 assessed by two blinded pathologists.

145

## 146 **Database analysis**

147 Datasets with more than 25 samples in each category from Sanchez-Carbayo bladder 2  
148 [34], Blaveri bladder 2 [35], and Stransky bladder [36] were used to analyze Spred2  
149 expression in bladder cancer. An unpaired two-tailed t test was used for the statistical  
150 analysis. Kaplan-Meier Plotter (<http://www.kmplot.com>) was used to analyze the  
151 prognostic values of *Spred2* mRNA expression levels in bladder carcinoma. Kaplan-  
152 Meier survival plots were drawn using data from the Kaplan-Meier database. A log-rank  
153  $p$ -value <0.05 was considered to indicate a statistically significant difference.

154

## 155 **Statistical analysis**

156 Statistical analysis was performed using GraphPad Prism7 (GraphPad Software, San  
157 Diego, CA, USA) and js-STAR (free software). Dunn's multiple comparison test was  
158 performed after Kruskal-Wallis test for the comparison of mean values among multi-  
159 groups. Multiple Fisher's exact test was performed using the Bonferroni correction for the

160 comparison of proportions among multi-groups. Mann-Whitney test was used for the  
161 comparison of mean values between the two groups. A value of  $p < 0.05$  was considered  
162 statistically significant.

163

## 164 **Results**

### 165 **Spred2 mRNA expression in bladder urothelial tumors**

166 We first examined Spred2 mRNA expression in various categories of 85 urothelial lesions  
167 including non-tumor, PUNLMP, LGPUC, HGPUC, CIS, and IUC. Figure 1A shows the  
168 representative HE and in situ hybridization photographs from each category, in which  
169 Spred2 mRNA expression was presented by red-dot (Fig 1A). The number of red-dots  
170 per cell was regarded as Spred2 mRNA expression level (Fig 1B). Levels of Spred2  
171 mRNA expression were increased as the malignancy of the cancer increased in papillary  
172 tumors. Of note, the level reached the peak in HGPUC and then decreased in CIS and  
173 IUC. Spred2 mRNA expression in IUC was significantly lower than that in HGPUC (Fig  
174 1B). These results indicate that Spred2 mRNA expression was up-regulated in non-  
175 invasive papillary bladder cancer as compared to cancers with high malignancy including  
176 invasive carcinoma.

177

### 178 **Spred2 protein expression in bladder urothelial tumors**

179 We next examined Spred2 protein expression by immunohistochemistry in 275 bladder  
180 urothelial tumors. To confirm immunoreactivity of Spred2 antibody, H1993 cells were  
181 stained with the antibody under overexpressing Spred2 (Supplementary Fig 1). Spred2  
182 protein expression (Fig 2A) was immunophenotypically classified into 4 groups,  
183 according to the subcellular localization and staining intensity. The staining pattern in  
184 each tumor category was shown in Table 2. In all non-tumor cases, Spred2 was positive  
185 in cytoplasm of basal and lower intermediate cells (pattern C+M-, 101/101 cases). More  
186 than half of the cases of PUNLMP, CIS, and IUC showed absent or weak staining (C-M-;  
187 74% (14/19 cases), 74% (29/39 cases), and 69% (22/32 cases), respectively). LGPUC and  
188 HGPUC showed membranous staining (C-M+ and C+M+) more frequently (49% (20/41

189 cases), and 51% (28/43 cases), respectively) than other categories (Table 2). We then  
190 compared mRNA and protein expression of Spred2. Cases with membranous staining,  
191 regardless of cytoplasmic staining pattern (C-M<sup>+</sup> and C<sup>+</sup>M<sup>+</sup>), showed significantly higher  
192 levels of Spred2 mRNA expression than those without membranous staining (C-M<sup>-</sup> and  
193 C<sup>+</sup>M<sup>-</sup>) (Fig 2B). Spred2 is a membrane-associated substrate of receptor tyrosine kinase  
194 [17, 37] and react with Raf localized in the raft domain of the plasma membrane [38],  
195 suggesting that membranous Spred2 is more meaningful when considering the functional  
196 regulation. The positive rate of membranous Spred2 expression (C-M<sup>+</sup> and C<sup>+</sup>M<sup>+</sup>) in each  
197 category was shown in Figure 2C, which showed that the expression was increased in  
198 LGPUC, peaked in HGPUC and then decreased in CIS and IUC. Together with the  
199 mRNA expression data, these results suggest that functional Spred2 was most expressed  
200 in HGPUC, and the expression was lower in CIS and IUC as compared to HGPUC.

201

## 202 **Expression of pERK and Ki67 in bladder urothelial tumors**

203 Increased Spred2 expression may affect the activation of the Ras/Raf/ERK-MAPK  
204 pathway and subsequent cancer growth. To address this possibility, we investigated the  
205 protein expression of phosphorylated ERK (pERK), an indicator of ERK-MAPK  
206 activation status, by immunohistochemically in each category. pERK was detected in the  
207 nucleus and cytoplasm of urothelial epithelial lesions in all specimens from each category  
208 with different intensity in strength (Fig 3A). The intensity of nuclear and cytoplasmic  
209 staining was then evaluated. Weak pERK staining (score, 1 and 2) was detected in 87%  
210 (score 1; 67/101, score 2; 21/101 cases) and 100% (score 1; 13/19, score 2; 6/19 cases)  
211 of non-tumor and PUNLMP, respectively (Table 3). In cancer categories (LGPUC,  
212 HGPUC, CIS and IUC), cancer cells with moderate (score 3) and strong (score 4 and 5)  
213 staining were increased. Strong pERK staining was detected in 10% (score 4; 4/41, score  
214 5; 0/41), 44% (score 4; 14/43, score 5; 5/43 cases), 56% (score 4; 14/39, score 5; 8/39  
215 cases), and 78% (score 4; 16/32, score 5; 9/32 cases) in LGPUC, HGPUC, CIS and IUC,  
216 respectively (Table 3). pERK score in each category was increased according to the  
217 malignant potential (Fig 3B). We next performed Ki67 immunohistochemistry (Fig 4A)



218 and calculated Ki67 index (Fig 4B), an indicator of cell proliferation marker, in all  
219 categories. Ki67 index was significantly increased in all categories of bladder urothelial  
220 tumors as compared to non-tumor. Ki67 index of HGPUC, CIS and IUC was significantly  
221 higher than that of LGPUC (Fig 4B). Thus, pERK score and Ki67 index increase with  
222 high malignancy.

223

## 224 **Comparison between pERK score/Ki67 index and membranous Spred2** 225 **expression**

226 We next compared the relation between pERK score/Ki67 index and membranous Spred2  
227 expression (negative: M-, positive: M+) in cancer categories. In HGPUC, pERK score  
228 with Spred2 M+ were lower than those with Spred2 M-. No differences were found in  
229 LGPUC, CIS and IUC (Fig 5A). Since an increase in pERK is generally associated with  
230 an increased Ki67 index [39], ERK activation may result in increased tumor cell  
231 proliferation. As shown in Figure 5B, Ki67 index in HGPUC with Spred2 M+ was lower  
232 than those with Spred2 M-. These results suggest that membranous Spred2 plays a role  
233 in down-regulated ERK activation and subsequent cancer cell proliferation in HGPUC,  
234 but this negative regulatory mechanism is not functioning in CIS. Although pERK score  
235 was not different between Spred2 M- and Spred2 M+ in IUC, Ki67 index was decreased  
236 in Spred2 M+ as compared to Spred2 M-, indicating that Spred2 may downregulate  
237 cancer cell proliferation through ERK-MAPK independent pathway in IUC.

238

## 239 **Database analyses of Spred2 expression and overall survival**

240 We examined Spred2 expression in bladder cancer database by Sanchez-Carbayo bladder  
241 2 dataset [34], Blaveri bladder 2 [35], and Stransky bladder [36] in a public cancer  
242 microarray database (ONCOMINE) [40]. As shown in Figure 6A, Spred2 expression was  
243 significantly increased in non-invasive superficial bladder cancer compared to that in  
244 normal bladder samples (Fig 6A, left). Of note, Spred2 expression in infiltrating bladder  
245 urothelial carcinoma was lower than superficial bladder cancer, which was also found in  
246 the other datasets (Fig 6A, middle and right). The decreased Spred2 expression in

247 infiltrating bladder urothelial carcinoma may have affected cancer survival. We then  
248 assessed the prognostic value of Spred2 in patients with bladder carcinoma in Kaplan-  
249 Meier Plotter ([www.kmplot.com](http://www.kmplot.com)). The overall survival for 30 months was higher in  
250 patients with higher Spred2 mRNA level (Fig 6B). Although there was no statistical  
251 significance in the 150 month-overall survival between the groups (Fig 6C, upper panel),  
252 the median survival in Spred2 high expression cohort (42.33 months) was 1.6 times longer  
253 than low expression cohort (28.63 months) (Fig 6C, lower panel). Thus, the expression  
254 level of Spred2 can be clinically important in the cancer progression.

255

## 256 **Discussion**

257 Cancer cell growth is mediated by various cell signaling pathways. Among them,  
258 Ras/Raf/ERK-MAPK is often up-regulated in human diseases including cancer [41], and  
259 as such represents an attractive target for the development of anti-cancer drugs [19]. This  
260 pathway is also important in urothelial cell migration and invasion [42]. A better  
261 understanding of the endogenous negative regulatory mechanism(s) could improve  
262 strategies for preventing and treating bladder urothelial tumors. To the best of our  
263 knowledge, this is the first report to show Spred2 mRNA and protein expression in  
264 bladder urothelial tumors in all categories, ranging from non-tumor to invasive cancer.

265 Previous studies demonstrated that Spred2 mRNA expression was decreased in  
266 hepatocellular carcinoma (HCC) [31] and prostatic adenocarcinoma [32], comparing with  
267 that in adjacent non-tumor tissue and benign gland, respectively. Down-regulated Spred2  
268 expression was particularly evident in higher grade prostate cancers [32], and Spred2  
269 expression levels in HCC tissue were inversely correlated with the incidence of tumor  
270 invasion and metastasis [31]. These previous findings indicated that Spred2 may function  
271 as a potential tumor suppressor gene. In our study, Spred2 mRNA expression was  
272 increased in non-invasive cancer HGPUC, whereas the expression in invasive bladder  
273 cancer IUC was significantly decreased as compared to that in non-invasive carcinoma  
274 HGPUC. Consistently, database analyses showed that Spred2 expression in infiltrating  
275 bladder urothelial carcinoma (invasive) was lower than that in superficial bladder cancer

276 (non-invasive). Protein expression of functional Spred2, a membranous positive staining,  
277 was frequently observed in LGPUC and HGPUC, but not in CIS and IUC. Thus, Spred2  
278 may play a role as a tumor suppressor in non-invasive carcinomas, but the function  
279 appears to be lost in invasive carcinoma.

280 Spred2 was discovered as a membrane-associated substrates of receptor tyrosine  
281 kinases [17, 37]. However; our data indicated that Spred2 was found not only in the  
282 membrane but in the cytoplasm in urothelial tumors. Previous confocal microscopy  
283 analyses revealed that Spred2 was present in cytoplasm and co-localized with neighbor  
284 of BRCA1 (NBR1) [43] or microtubule-associated protein 1A/1B-light chain 3  
285 (*LC3*) [44]. Very interestingly, Spred2-NBR1 complex enhanced Spred2-mediated ERK  
286 inhibition upon stimulation with fibroblast growth factor (FGF), suggesting that  
287 Spred2/NBR1-dependent down-regulation of ERK-MAPK is achieved via directed  
288 endosomal trafficking of activated receptors [43]. Sprouty proteins, a member of the  
289 Sprouty/Spred family, were distributed throughout the cytosol, which were underwent  
290 rapid translation to membrane ruffles following epidermal growth factor (EGF)  
291 stimulation [45]. In urothelial tumors, we showed that membranous Spred2 protein was  
292 favorably detected in cancer categories, especially LGPUC and HGPUC. These results  
293 indicate that Spred2 may transition from cytoplasm to cell membrane by various stimuli  
294 in the cancer microenvironment, exerting the function.

295 ERK activation was associated with increased Ki67 expression in salivary gland  
296 mucoepidermoid carcinoma [39]. Since Spred2 inhibits the ERK pathway and subsequent  
297 cell proliferation, we compared the relationship between membranous Spred2 protein  
298 expression and pERK score/Ki67 index in each cancer category. Interestingly, HGPUC  
299 displaying membranous Spred2 expression showed significantly lower pERK score and  
300 Ki67 index, as compared to membrane-negative expression. On the other hand, pERK  
301 score was not affected by membranous Spred2 expression in CIS and IUC. Spred2 is  
302 presumed to be effective only after reaching a certain level of membrane expression. It  
303 appears that ERK activation was so strong in CIS and IUC that concurrent membranous  
304 Spred2 expression might be insufficient to suppress the aberrant ERK activation in CIS

305 and IUC. Interestingly, Ki67 index was decreased in IUC with membranous Spred2  
306 expression, although pERK score was not altered by membranous Spred2 expression.  
307 Spred2 may downregulate cancer cell proliferation through ERK-MAPK independent  
308 pathway in IUC. Spred2 gene mutations can be frequently seen in bladder urothelial  
309 carcinoma (Supplementary Fig. 2). The mutated Spred2 may function differently.

310 Spred2 mRNA expression in CIS was as high as that in HGPUC, however; 75% of  
311 CIS showed negative membranous Spred2 staining and only 15% of CIS showed positive  
312 membranous Spred2 staining. It remains unclear how Spred2 protein expression is  
313 regulated in CIS. The poor correlations were generally reported between the level of  
314 mRNA and protein [46, 47]. There are many complicated and varied post-transcriptional  
315 mechanisms; post-transcriptional, translational and protein degradation regulation. CIS  
316 appears to be the critical turning-point to control the complex regulation. Further study is  
317 necessary to understand the specific mechanisms regulating Spred2 mRNA and protein  
318 expression.

319 In conclusion, Spred2 mRNA and protein expression was up-regulated as the grade  
320 increased in non-invasive papillary urothelial carcinomas. Membranous Spred2  
321 expression in HGPUC, but not in CIS and IUC, correlated with significantly low levels  
322 of ERK activity. In bladder cancer, HGPUC is clinically important because tumor grows  
323 more quickly and more likely spread, and tumor progression (invasion) was identified in  
324 40% of all cases [48]. Our present study suggests that Spred2 functions to suppress the  
325 growth and progression of cancer in non-invasive bladder cancer through suppressing the  
326 ERK pathway, and this regulatory mechanism does not function in invasive bladder  
327 cancer.

328

## 329 **Supporting information**

330 **S1 Fig. Immunoreactivity of Spred2 antibody.** H1993 cells cultured on Lab-Tek II  
331 Slide (8 Chamber, Electron Microscopy Sciences, Hatfield, PA, USA) were transfected  
332 with Spred2 expression plasmid (OriGene, Rockville, MD, USA) or control plasmid  
333 (OriGene) using turbofectin 8.0 (OriGene). The cells were fixed in 95% ethanol and

334 immunostained with anti-Spred2 polyclonal antibody using the polymer method (Polink-  
335 2 Plus HRP RABBIT with DAB kit, GBI, Bothell, WA, USA). Spred2 positive cells were  
336 shown in brown.

337

338 **S2 Fig. The mutation of Spred2 in cancers.** Data were from TCGA Pancancer Atlas  
339 from cBioPortal for Cancer Genomics (<https://www.cbioportal.org/results/plots>). (A) The  
340 Spred2 mutations in different cancer. Bladder cancer is the 3<sup>rd</sup> place having mutation of  
341 Spred2 among cancers. (B) The distribution of mutations on the domain structure of  
342 Spred2 in bladder urothelial carcinoma.

343

## 344 **Acknowledgments**

345 We thank Mr. Hiroyuki Watanabe and Yasuharu Arashima for their excellent technical  
346 assistance. This work was supported in part by JSPS KAKENHI Grant number 25293095,  
347 21H02988 and 16K15258.

348

## 349 **Author contributions**

350 **Conceptualization:** Shinsuke Oda, Akihiro Matsukawa.

351 **Data curation:** Shinsuke Oda, Akihiro Matsukawa.

352 **Formal analysis:** Shinsuke Oda, Akihiro Matsukawa.

353 **Funding acquisition:** Akihiro Matsukawa.

354 **Investigation:** Shinsuke Oda, Masayoshi Fujisawa, Li Chunning, Takahiro Yamaguchi.

355 **Methodology:** Shinsuke Oda, Masayoshi Fujisawa, Toshihiro Ito, Teizo Yoshimura.

356 **Project administration:** Akihiro Matsukawa.

357 **Supervision:** Akihiro Matsukawa.

358 **Writing – original draft:** Shinsuke Oda, Masayoshi Fujisawa.

359 **Writing – review & editing:** Teizo Yoshimura, Toshihiro Ito, Akihiro Matsukawa

360

## 361 **References**

- 362 1. Sanli O, Dobruch J, Knowles MA, Burger M, Alemozaffar M, Nielsen ME et al.  
363 Bladder cancer. *Nat Rev Dis Primers*. 2017; 3: 17022.
- 364 2. Siegel RL, Miller KD, Fuchs HE, Jemal A. Cancer Statistics, 2021. *CA Cancer J*  
365 *Clin*. 2021; 71: 7-33.
- 366 3. Castillo-Martin M, Domingo-Domenech J, Karni-Schmidt O, Matos T, Cordon-  
367 Cardo C. Molecular pathways of urothelial development and bladder tumorigenesis.  
368 *Urol Oncol*. 2010; 28: 401-408.
- 369 4. Wu XR. Urothelial tumorigenesis: a tale of divergent pathways. *Nat Rev Cancer*.  
370 2005; 5: 713-725.
- 371 5. Kaufman DS, Shipley WU, Feldman AS. Bladder cancer. *Lancet*. 2009; 374: 239-  
372 249.
- 373 6. Kirkali Z, Chan T, Manoharan M, Algaba F, Busch C, Cheng L et al. Bladder  
374 cancer: epidemiology, staging and grading, and diagnosis. *Urology*. 2005; 66: 4-34.
- 375 7. Cancer GARN. Comprehensive molecular characterization of urothelial bladder  
376 carcinoma. *Nature*. 2014; 507: 315-322.
- 377 8. Billerey C, Chopin D, Aubriot-Lorton MH, Ricol D, Gil Diez de Medina S, Van  
378 Rhijn B et al. Frequent FGFR3 mutations in papillary non-invasive bladder (pTa)  
379 tumors. *Am J Pathol*. 2001; 158: 1955-1959.
- 380 9. Kobayashi H, Kikuchi E, Mikami S, Maeda T, Tanaka N, Miyajima A et al. Long  
381 term follow-up in patients with initially diagnosed low grade Ta non-muscle  
382 invasive bladder tumors: tumor recurrence and worsening progression. *BMC Urol*.  
383 2014; 14: 5.
- 384 10. Miyamoto H, Brimo F, Schultz L, Ye H, Miller JS, Fajardo DA et al. Low-grade  
385 papillary urothelial carcinoma of the urinary bladder: a clinicopathologic analysis  
386 of a post-World Health Organization/International Society of Urological Pathology  
387 classification cohort from a single academic center. *Arch Pathol Lab Med*. 2010;  
388 134: 1160-1163.
- 389 11. Puzio-Kuter AM, Castillo-Martin M, Kinkade CW, Wang X, Shen TH, Matos T et

- 390 al. Inactivation of p53 and Pten promotes invasive bladder cancer. *Genes Dev.* 2009;  
391 23: 675-680.
- 392 12. Chatterjee SJ, George B, Goebell PJ, Alavi-Tafreshi M, Shi SR, Fung YK et al.  
393 Hyperphosphorylation of pRb: a mechanism for RB tumour suppressor pathway  
394 inactivation in bladder cancer. *J Pathol.* 2004; 203: 762-770.
- 395 13. Eblen ST. Extracellular-Regulated Kinases: Signaling From Ras to ERK Substrates  
396 to Control Biological Outcomes. *Adv Cancer Res.* 2018; 138: 99-142.
- 397 14. Guo YJ, Pan WW, Liu SB, Shen ZF, Xu Y, Hu LL. ERK/MAPK signalling pathway  
398 and tumorigenesis. *Exp Ther Med.* 2020; 19: 1997-2007.
- 399 15. Fan L, Wang Y, Wang W, Wei X. Carcinogenic role of K-Ras-ERK1/2 signaling in  
400 bladder cancer via inhibition of H1.2 phosphorylation at T146. *J Cell Physiol.* 2019;  
401 234: 21135-21144.
- 402 16. Karlou M, Saetta AA, Korkolopoulou P, Levidou G, Papanastasiou P, Boltetsou E  
403 et al. Activation of extracellular regulated kinases (ERK1/2) predicts poor prognosis  
404 in urothelial bladder carcinoma and is not associated with B-Raf gene mutations.  
405 *Pathology.* 2009; 41: 327-334.
- 406 17. Wakioka T, Sasaki A, Kato R, Shouda T, Matsumoto A, Miyoshi K et al. Spred is  
407 a Sprouty-related suppressor of Ras signalling. *Nature.* 2001; 412: 647-651.
- 408 18. Prior IA, Hood FE, Hartley JL. The Frequency of Ras Mutations in Cancer. *Cancer*  
409 *Res.* 2020; 80: 2969-2974.
- 410 19. Degirmenci U, Wang M, Hu J. Targeting Aberrant RAS/RAF/MEK/ERK Signaling  
411 for Cancer Therapy. *Cells.* 2020; 9:
- 412 20. Hashimoto K, Yamane M, Sugimoto S, Hirano Y, Kurosaki T, Otani S et al.  
413 Negative impact of recipient SPRED2 deficiency on transplanted lung in a mouse  
414 model. *Transpl Immunol.* 2019; 57: 101242.
- 415 21. Itakura J, Sato M, Ito T, Mino M, Fushimi S, Takahashi S et al. Spred2-deficiency  
416 Protects Mice from Polymicrobial Septic Peritonitis by Enhancing Inflammation  
417 and Bacterial Clearance. *Sci Rep.* 2017; 7: 12833.
- 418 22. Ito T, Itakura J, Takahashi S, Sato M, Mino M, Fushimi S et al. Sprouty-Related



- 419 Ena/Vasodilator-Stimulated Phosphoprotein Homology 1-Domain-Containing  
420 Protein-2 Critically Regulates Influenza A Virus-Induced Pneumonia. *Crit Care*  
421 *Med.* 2016; 44: e530-43.
- 422 23. Kawara A, Mizuta R, Fujisawa M, Ito T, Li C, Nakamura K et al. Spred2-deficiency  
423 enhances the proliferation of lung epithelial cells and alleviates pulmonary fibrosis  
424 induced by bleomycin. *Sci Rep.* 2020; 10: 16490.
- 425 24. Ohkura T, Yoshimura T, Fujisawa M, Ohara T, Marutani R, Usami K et al. Spred2  
426 Regulates High Fat Diet-Induced Adipose Tissue Inflammation, and Metabolic  
427 Abnormalities in Mice. *Front Immunol.* 2019; 10: 17.
- 428 25. Okada M, Yamane M, Yamamoto S, Otani S, Miyoshi K, Sugimoto S et al. SPRED2  
429 deficiency may lead to lung ischemia-reperfusion injury via ERK1/2 signaling  
430 pathway activation. *Surg Today.* 2018; 48: 1089-1095.
- 431 26. Takahashi S, Yoshimura T, Ohkura T, Fujisawa M, Fushimi S, Ito T et al. A Novel  
432 Role of Spred2 in the Colonic Epithelial Cell Homeostasis and Inflammation. *Sci*  
433 *Rep.* 2016; 6: 37531.
- 434 27. Wakabayashi H, Ito T, Fushimi S, Nakashima Y, Itakura J, Qiuying L et al. Spred-  
435 2 deficiency exacerbates acetaminophen-induced hepatotoxicity in mice. *Clin*  
436 *Immunol.* 2012; 144: 272-282.
- 437 28. Xu Y, Ito T, Fushimi S, Takahashi S, Itakura J, Kimura R et al. Spred-2 deficiency  
438 exacerbates lipopolysaccharide-induced acute lung inflammation in mice. *PLoS*  
439 *One.* 2014; 9: e108914.
- 440 29. Yang X, Fujisawa M, Yoshimura T, Ohara T, Sato M, Mino M et al. Spred2  
441 Deficiency Exacerbates D-Galactosamine/Lipopolysaccharide -induced Acute  
442 Liver Injury in Mice via Increased Production of TNF $\alpha$ . *Sci Rep.* 2018; 8: 188.
- 443 30. Ma XN, Liu XY, Yang YF, Xiao FJ, Li QF, Yan J et al. Regulation of human  
444 hepatocellular carcinoma cells by Spred2 and correlative studies on its mechanism.  
445 *Biochem Biophys Res Commun.* 2011; 410: 803-808.
- 446 31. Yoshida T, Hisamoto T, Akiba J, Koga H, Nakamura K, Tokunaga Y et al. Spreds,  
447 inhibitors of the Ras/ERK signal transduction, are dysregulated in human



- 448 hepatocellular carcinoma and linked to the malignant phenotype of tumors.  
449 Oncogene. 2006; 25: 6056-6066.
- 450 32. Kachroo N, Valencia T, Warren AY, Gnanapragasam VJ. Evidence for  
451 downregulation of the negative regulator SPRED2 in clinical prostate cancer. Br J  
452 Cancer. 2013; 108: 597-601.
- 453 33. Rodriguez FJ, Scheithauer BW, Giannini C, Bryant SC, Jenkins RB. Epithelial and  
454 pseudoepithelial differentiation in glioblastoma and gliosarcoma: a comparative  
455 morphologic and molecular genetic study. Cancer. 2008; 113: 2779-2789.
- 456 34. Pich A, Chiusa L, Formiconi A, Galliano D, Bortolin P, Comino A et al.  
457 Proliferative activity is the most significant predictor of recurrence in noninvasive  
458 papillary urothelial neoplasms of low malignant potential and grade 1 papillary  
459 carcinomas of the bladder. Cancer. 2002; 95: 784-790.
- 460 35. Blaveri E, Simko JP, Korkola JE, Brewer JL, Baehner F, Mehta K et al. Bladder  
461 cancer outcome and subtype classification by gene expression. Clin Cancer Res.  
462 2005; 11: 4044-4055.
- 463 36. Stransky N, Vallot C, Reyat F, Bernard-Pierrot I, de Medina SG, Segraves R et al.  
464 Regional copy number-independent deregulation of transcription in cancer. Nat  
465 Genet. 2006; 38: 1386-1396.
- 466 37. Engelhardt CM, Bundschu K, Messerschmitt M, Renné T, Walter U, Reinhard M et  
467 al. Expression and subcellular localization of Spred proteins in mouse and human  
468 tissues. Histochem Cell Biol. 2004; 122: 527-538.
- 469 38. Chiu CF, Ho MY, Peng JM, Hung SW, Lee WH, Liang CM et al. Raf activation by  
470 Ras and promotion of cellular metastasis require phosphorylation of prohibitin in  
471 the raft domain of the plasma membrane. Oncogene. 2013; 32: 777-787.
- 472 39. Handra-Luca A, Bilal H, Bertrand JC, Fouret P. Extra-cellular signal-regulated  
473 ERK-1/ERK-2 pathway activation in human salivary gland mucoepidermoid  
474 carcinoma: association to aggressive tumor behavior and tumor cell proliferation.  
475 Am J Pathol. 2003; 163: 957-967.
- 476 40. Rhodes DR, Yu J, Shanker K, Deshpande N, Varambally R, Ghosh D et al.

- 477 ONCOMINE: a cancer microarray database and integrated data-mining platform.  
478 *Neoplasia*. 2004; 6: 1-6.
- 479 41. Kim EK, Choi EJ. Pathological roles of MAPK signaling pathways in human  
480 diseases. *Biochim Biophys Acta*. 2010; 1802: 396-405.
- 481 42. Ling S, Chang X, Schultz L, Lee TK, Chaux A, Marchionni L et al. An EGFR-  
482 ERK-SOX9 signaling cascade links urothelial development and regeneration to  
483 cancer. *Cancer Res*. 2011; 71: 3812-3821.
- 484 43. Mardakheh FK, Yekezare M, Machesky LM, Heath JK. Spred2 interaction with the  
485 late endosomal protein NBR1 down-regulates fibroblast growth factor receptor  
486 signaling. *J Cell Biol*. 2009; 187: 265-277.
- 487 44. Jiang K, Liu M, Lin G, Mao B, Cheng W, Liu H et al. Tumor suppressor Spred2  
488 interaction with LC3 promotes autophagosome maturation and induces autophagy-  
489 dependent cell death. *Oncotarget*. 2016; 7: 25652-25667.
- 490 45. Lim J, Wong ES, Ong SH, Yusoff P, Low BC, Guy GR. Sprouty proteins are  
491 targeted to membrane ruffles upon growth factor receptor tyrosine kinase activation.  
492 Identification of a novel translocation domain. *J Biol Chem*. 2000; 275: 32837-  
493 32845.
- 494 46. Maier T, Güell M, Serrano L. Correlation of mRNA and protein in complex  
495 biological samples. *FEBS Lett*. 2009; 583: 3966-3973.
- 496 47. Vogel C, Marcotte EM. Insights into the regulation of protein abundance from  
497 proteomic and transcriptomic analyses. *Nat Rev Genet*. 2012; 13: 227-232.
- 498 48. Chaux A, Karram S, Miller JS, Fajardo DA, Lee TK, Miyamoto H et al. High-grade  
499 papillary urothelial carcinoma of the urinary tract: a clinicopathologic analysis of a  
500 post-World Health Organization/International Society of Urological Pathology  
501 classification cohort from a single academic center. *Hum Pathol*. 2012; 43: 115-  
502 120.
- 503

## 504 **Figure legends**

505

506 **Fig 1. Spred2 mRNA expression in urothelial tumors.** (A) Representative photographs  
507 of HE- (original magnification 400×) and in situ hybridization-sections from each  
508 category are shown. Spred2 mRNA expression was presented by red dots. (B) The  
509 number of the red-dots per cell was counted under microscope and Spred2 mRNA  
510 expression level was shown per one cell from each category (N: non-tumor; n=10, P:  
511 PUNLMP; n=10, L: LGPUC; n=15, H: HGPUC; n=18, C: CIS; n=18, and I: IUC; n=14).  
512 Data were mean ± SEM. # $p$ <0.05, § $p$ <0.01, ¶ $p$ <0.001, \* $p$ <0.0001 (Dunn's multiple  
513 comparison test).

514

515 **Fig 2. Immunohistochemical analyses of Spred2 protein expression in urothelial**  
516 **tumors.** (A) Representative photographs of Spred2 immunohistochemistry (original  
517 magnification 400×) from each category are shown. (B) Expression levels of Spred2  
518 mRNA in each Spred2 staining pattern were shown. C; cytoplasm, M; membrane. (C-M-;  
519 n=81, C+M-; n=122, C-M+; n=54, C+M+; n=11). Data were mean ± SEM. # $p$ <0.05,  
520 § $p$ <0.01 (Dunn's multiple comparison test). (C) The positive rate of membranous Spred2  
521 expression in each category was shown (N: non-tumor; n=101, P: PUNLMP; n=19, L:  
522 LGPUC; n=41, H: HGPUC; n=43, C: CIS; n=39, and I: IUC; n=32). Data were mean ±  
523 SEM. # $p$ <0.05, § $p$ <0.01 (Multiple Fisher's exact test).

524

525 **Fig 3. pERK score in urothelial tumors.** (A) Representative photographs of pERK  
526 immunohistochemistry (original magnification 400×) from each category are shown. (B)  
527 pERK staining intensity was evaluated and scored (0-5), and pERK score in each category  
528 was shown (N: non-tumor; n=101, P: PUNLMP; n=19, L: LGPUC; n=41, H: HGPUC;  
529 n=43, C: CIS; n=39, and I: IUC; n=32). Data were mean ± SEM. § $p$ <0.01, ¶ $p$ <0.001,  
530 \* $p$ <0.0001 (Dunn's multiple comparison test).

531

532 **Fig 4. Ki67 index in urothelial tumors.** (A) Representative photographs of Ki67

533 immunohistochemistry (original magnification 400×) from each category are shown. (B)  
534 Ki67 index in each category was shown (N: non-tumor; n=101, P: PUNLMP; n=19, L:  
535 LGPUC; n=41, H: HGPUC; n=43, C: CIS; n=39, and I: IUC; n=32). Data were mean ±  
536 SEM. # $p<0.05$ , § $p<0.01$ , ¶ $p<0.001$ , \* $p<0.0001$  (Dunn's multiple comparison test).

537

538 **Figure 5. Comparison between pERK score/Ki67 index and membranous Spred2**  
539 **expression.** pERK score (A) and Ki67 index (B) were compared between membranous  
540 Spred2 negative (M-) and positive (M+) in cancer categories (LGPUC; n=41, HGPUC;  
541 n=43, CIS; n=39, and IUC; n=32). Bar in each graph represents median. # $p<0.05$ , § $p<0.01$   
542 (Mann-Whitney test).

543

544 **Fig 6. Spred2 expression in overall survival of patients with bladder cancer.** (A)  
545 Statistical analyses of Spred2 expression in normal, superficial bladder cancer  
546 (superficial) and infiltrating bladder urothelial carcinoma (infiltrating) from 3 different  
547 datasets (Sanchez-Carbayo bladder 2, Blaveri bladder 2, and Stransky bladder) were  
548 shown. The numbers in parentheses indicates the number of samples. § $p<0.01$ , \* $p<0.0001$   
549 (unpaired two-tailed t test). (B, C) Kaplan-Meier analysis of the data in [www.kmplot.com](http://www.kmplot.com)  
550 was used to determine the survival probability for 30 months (B) and 150 months (C) of  
551 patients with high or low Spred2 expression, followed by the log-rank test.

552

553 **Table 1.** Cases for the enrolled 275 patients.

|           | cases (%)  | number of examined<br>by IHC/ISH | features    |               |              |
|-----------|------------|----------------------------------|-------------|---------------|--------------|
|           |            |                                  | progression | nuclear grade | invasiveness |
| non-tumor | 101 (36.7) | 101/10                           | -           | -             | -            |
| PUNLMP    | 19 (6.9)   | 19/10                            | slow        | very low      | non-invasive |
| LGPUC     | 41 (14.9)  | 41/15                            | slow        | low           | non-invasive |
| HGPUC     | 43 (15.6)  | 43/18                            | quick       | high          | non-invasive |
| CIS       | 39 (14.2)  | 39/18                            | quick       | high          | non-invasive |
| IUC       | 32 (11.6)  | 32/14                            | quick       | high>>low     | invasive     |

554 non-tumor; non-tumor urothelium, PUNLMP; papillary urothelial neoplasm of low malignant  
555 potential, LGPUC; low-grade papillary urothelial carcinoma, HGPUC; high-grade urothelial  
556 carcinoma, CIS; carcinoma in situ, IUC; infiltrating urothelial carcinoma. IHC;  
557 immunohistochemistry, ISH; in situ hybridization.

558

559 **Table 2.** Subcellular immunolocalization of Spred2 in each tumor category

|             | C-M- | C+M- | C-M+ | C+M+ | total cases |
|-------------|------|------|------|------|-------------|
| non-tumor   | 0    | 101  | 0    | 0    | 101         |
| PUNLMP      | 14   | 4    | 1    | 0    | 19          |
| LGPUC       | 15   | 6    | 20   | 0    | 41          |
| HGPUC       | 8    | 7    | 22   | 6    | 43          |
| CIS         | 29   | 4    | 4    | 2    | 39          |
| IUC         | 22   | 0    | 7    | 3    | 32          |
| total cases | 88   | 122  | 54   | 11   | 275         |

560 non-tumor; non-tumor urothelium, PUNLMP; papillary urothelial neoplasm of low malignant  
561 potential, LGPUC; low-grade papillary urothelial carcinoma, HGPUC; high-grade urothelial  
562 carcinoma, CIS; carcinoma in situ, IUC; infiltrating urothelial carcinoma. IHC;  
563 immunohistochemistry, ISH; in situ hybridization. C; cytoplasm, M; membrane.

564

565 Table 3. pERK score in Spred2 immunostaining pattern

| Spred2 pattern \ pERK score |      | 1  | 2  | 3  | 4  | 5 | total cases |
|-----------------------------|------|----|----|----|----|---|-------------|
| non-tumor                   | C-M- | 0  | 0  | 0  | 0  | 0 | 0           |
|                             | C+M- | 67 | 21 | 13 | 0  | 0 | 101         |
|                             | C-M+ | 0  | 0  | 0  | 0  | 0 | 0           |
|                             | C+M+ | 0  | 0  | 0  | 0  | 0 | 0           |
| PUNLMP                      | C-M- | 11 | 3  | 0  | 0  | 0 | 14          |
|                             | C+M- | 2  | 2  | 0  | 0  | 0 | 4           |
|                             | C-M+ | 0  | 1  | 0  | 0  | 0 | 1           |
|                             | C+M+ | 0  | 0  | 0  | 0  | 0 | 0           |
| LGPUC                       | C-M- | 3  | 4  | 8  | 0  | 0 | 15          |
|                             | C+M- | 1  | 0  | 3  | 2  | 0 | 6           |
|                             | C-M+ | 0  | 5  | 13 | 2  | 0 | 20          |
|                             | C+M+ | 0  | 0  | 0  | 0  | 0 | 0           |
| HGPUC                       | C-M- | 0  | 1  | 2  | 4  | 1 | 8           |
|                             | C+M- | 0  | 0  | 2  | 3  | 2 | 7           |
|                             | C-M+ | 0  | 4  | 14 | 4  | 0 | 22          |
|                             | C+M+ | 0  | 0  | 1  | 3  | 2 | 6           |
| CIS                         | C-M- | 0  | 1  | 11 | 11 | 6 | 29          |
|                             | C+M- | 0  | 0  | 2  | 1  | 1 | 4           |
|                             | C-M+ | 0  | 0  | 2  | 1  | 1 | 4           |
|                             | C+M+ | 0  | 0  | 1  | 1  | 0 | 2           |
| IUC                         | C-M- | 0  | 0  | 4  | 11 | 7 | 22          |
|                             | C+M- | 0  | 0  | 0  | 0  | 0 | 0           |
|                             | C-M+ | 0  | 1  | 1  | 3  | 2 | 7           |
|                             | C+M+ | 0  | 0  | 1  | 2  | 0 | 3           |

566 non-tumor; non-tumor urothelium, PUNLMP; papillary urothelial neoplasm of low malignant  
567 potential, LGPUC; low-grade papillary urothelial carcinoma, HGPUC; high-grade urothelial  
568 carcinoma, CIS; carcinoma in situ, IUC; infiltrating urothelial carcinoma. IHC;  
569 immunohistochemistry, ISH; in situ hybridization.



Fig 1

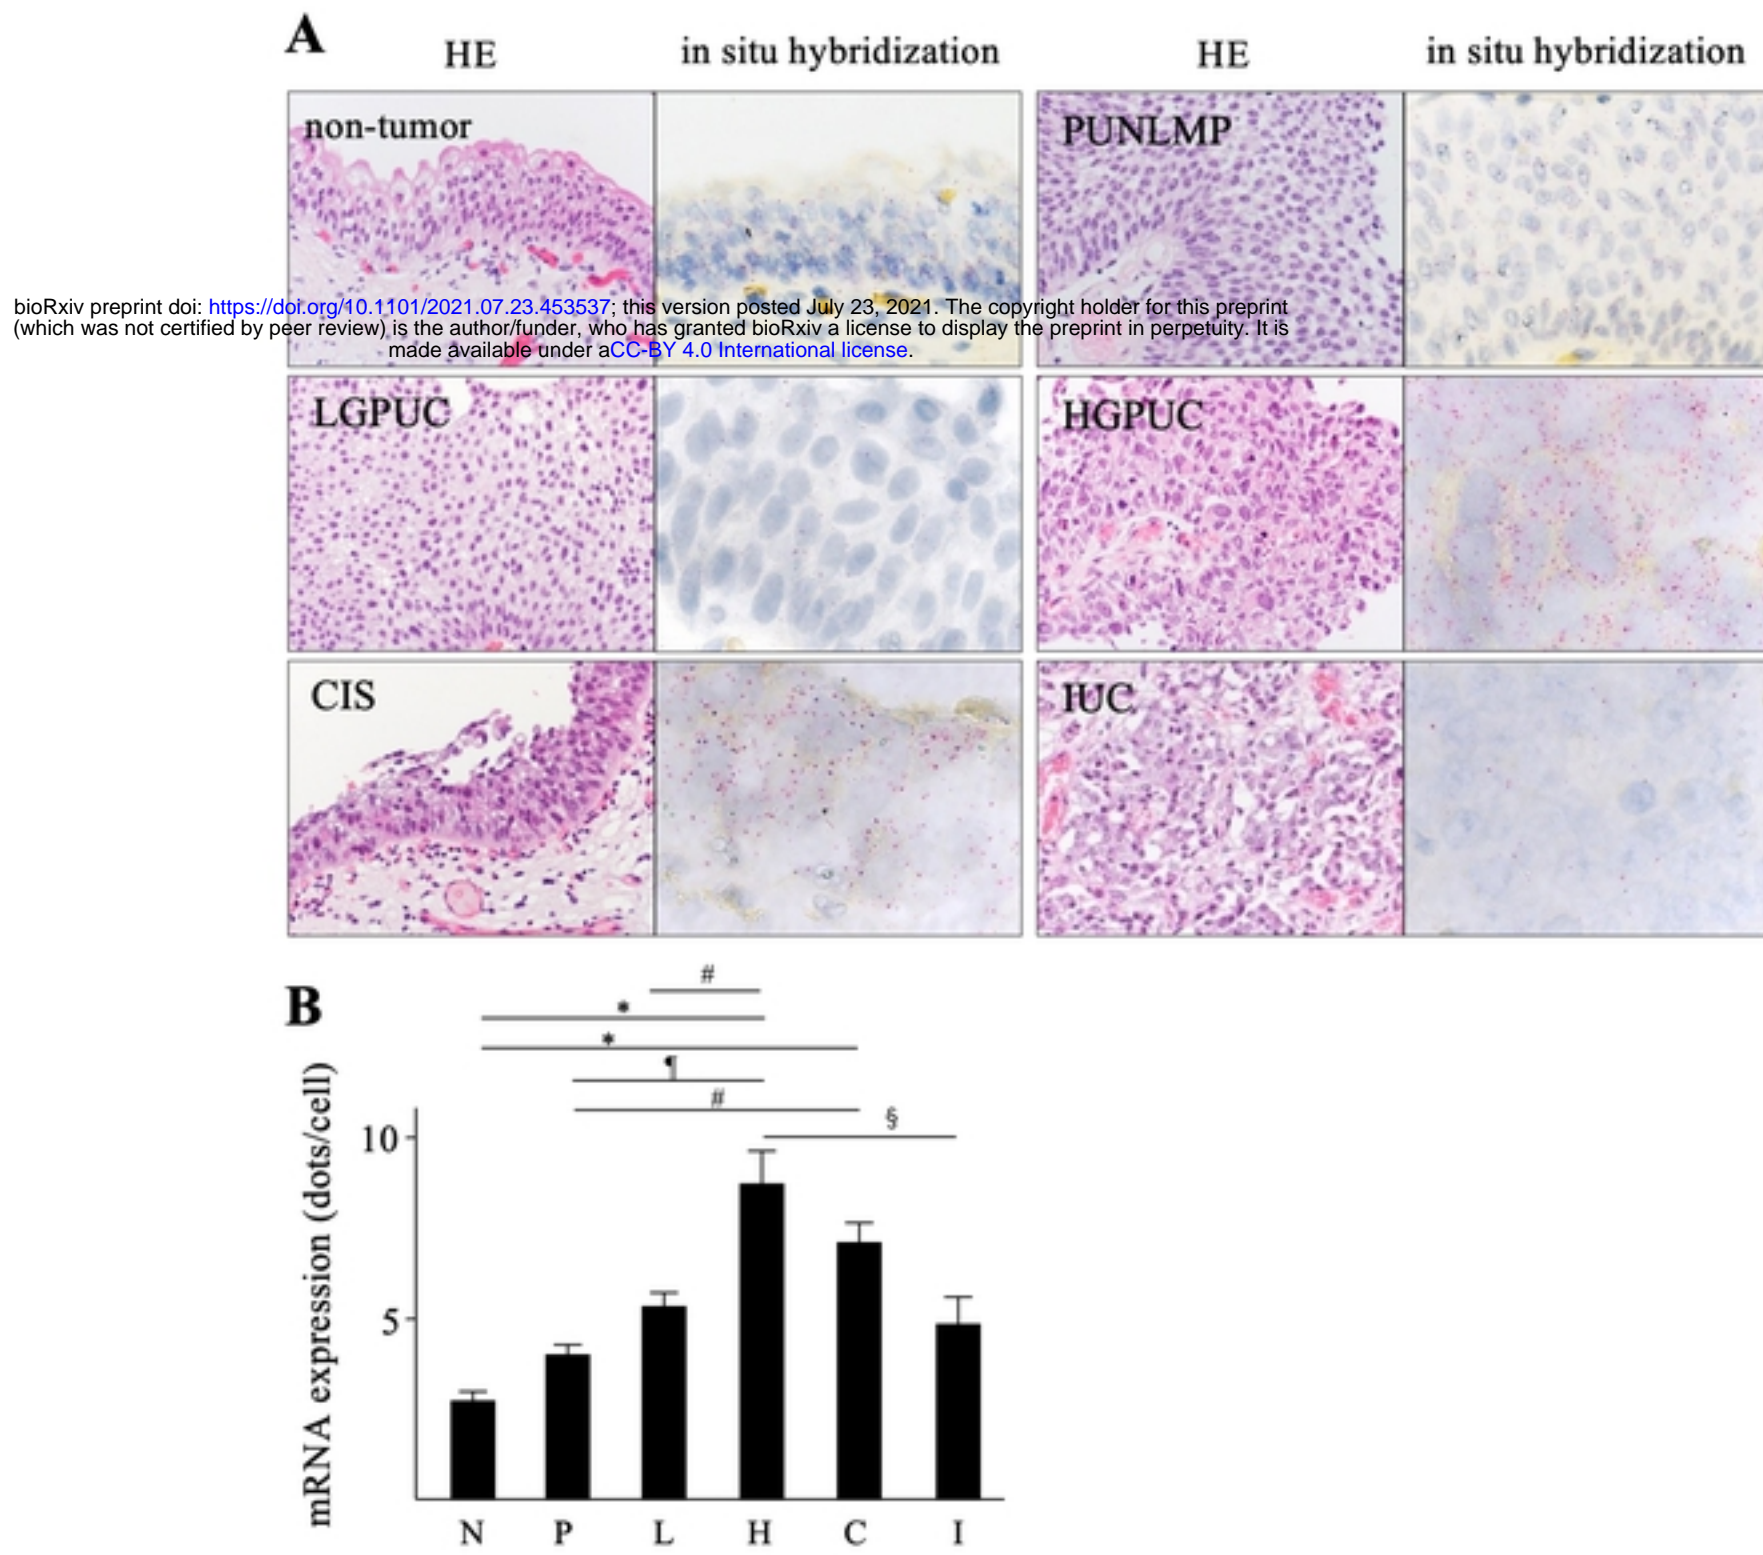



Fig 2

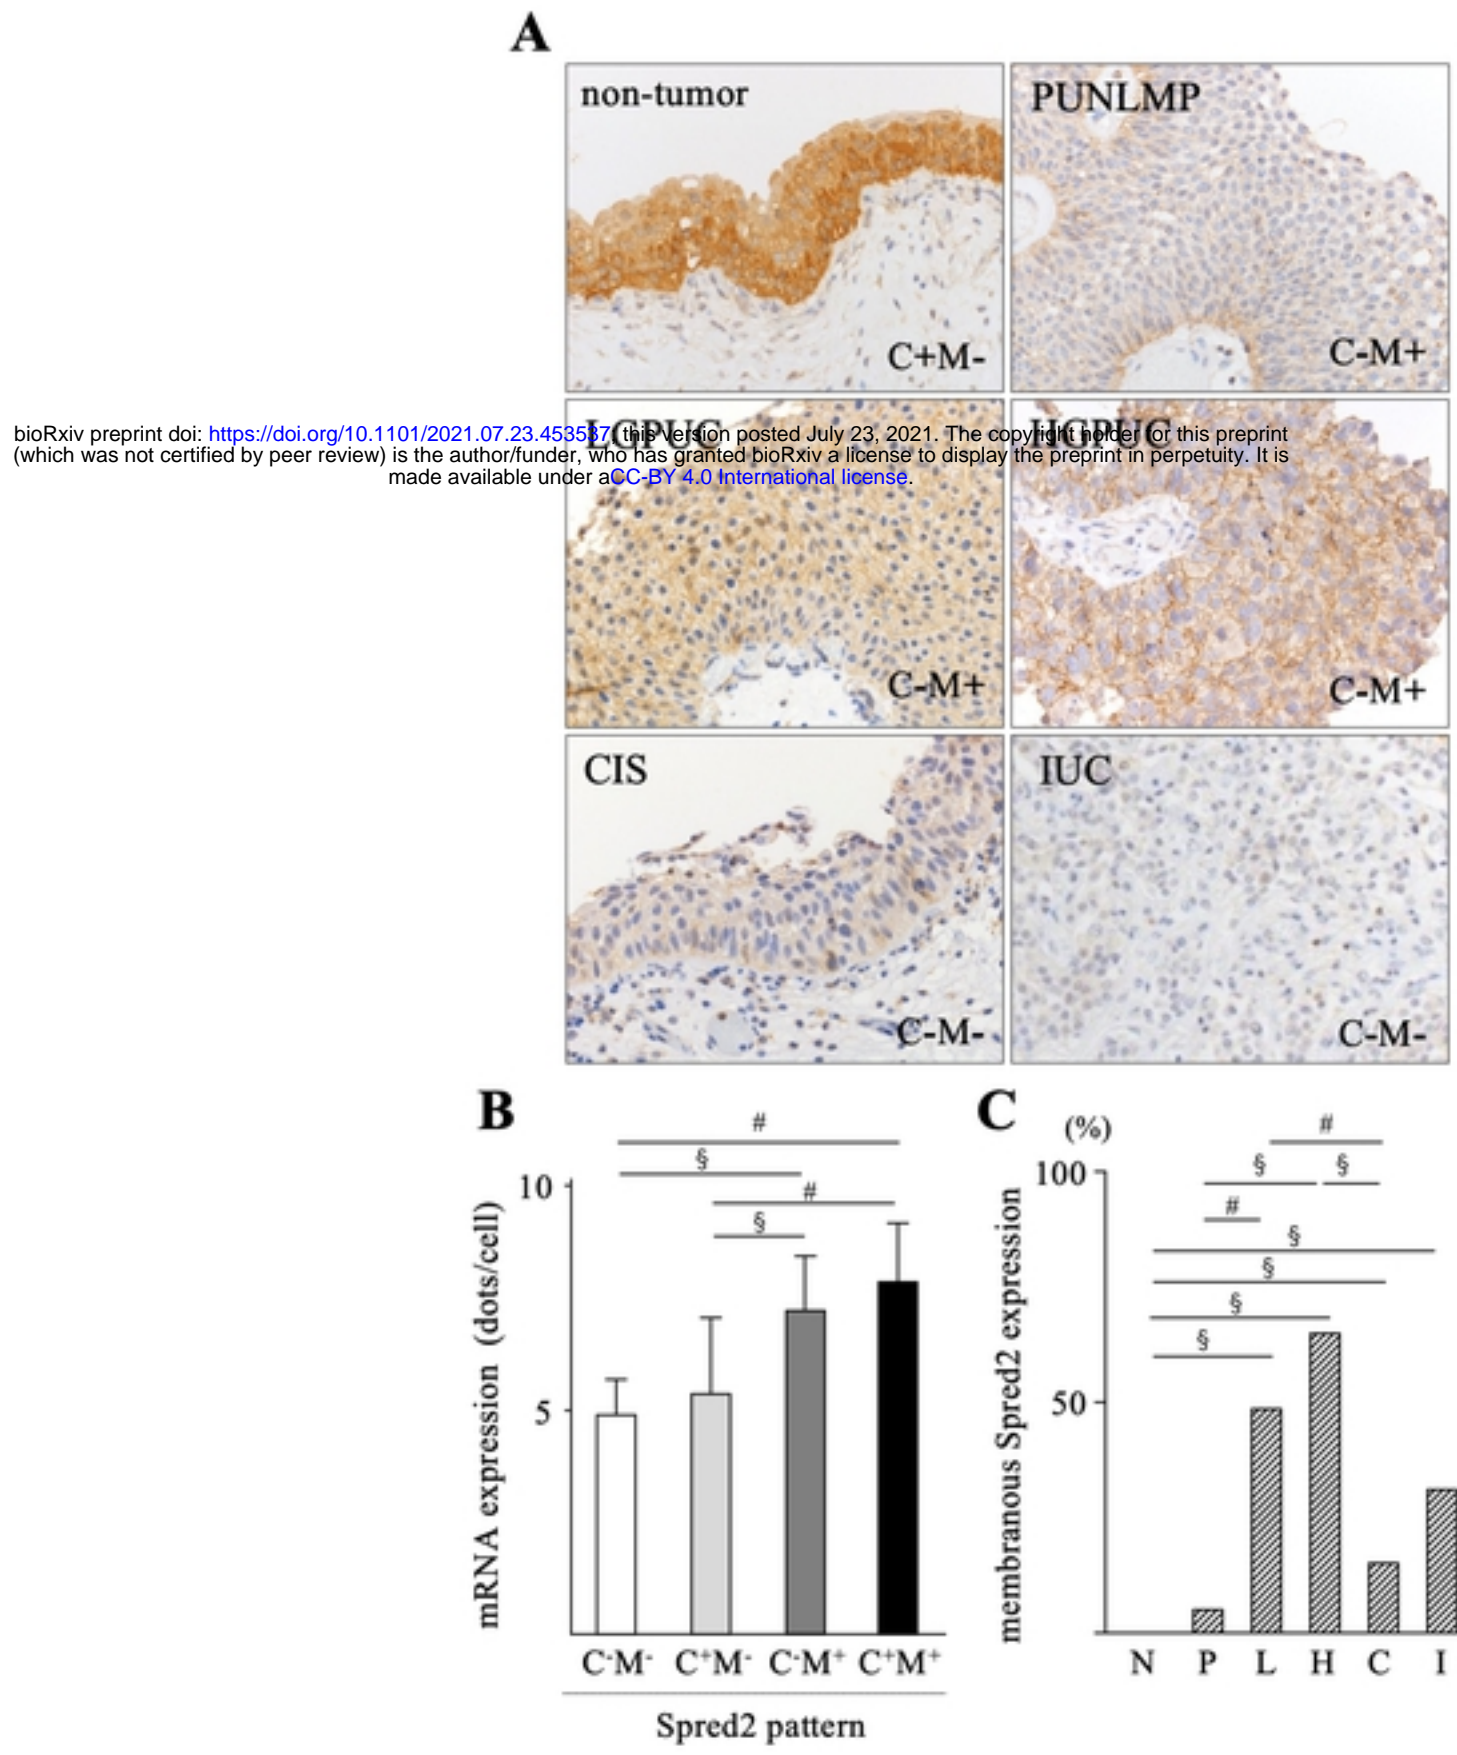

Figure 2

Fig 3

**A**

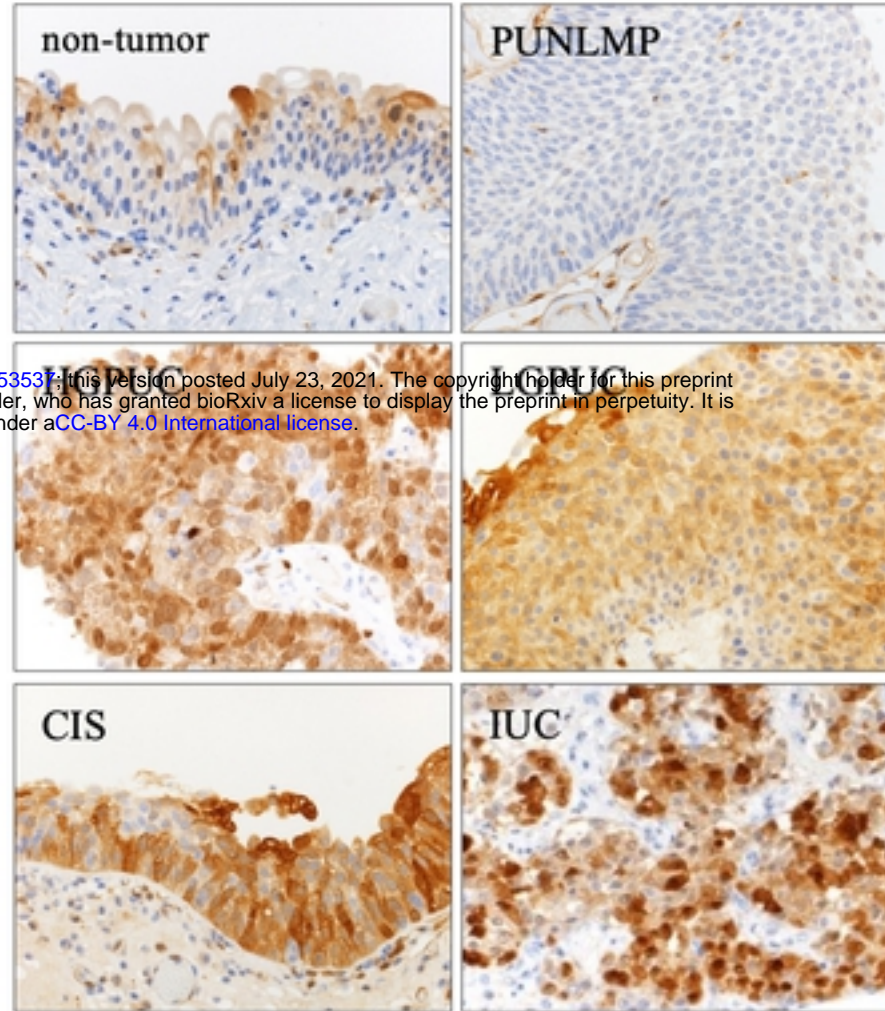

bioRxiv preprint doi: <https://doi.org/10.1101/2021.07.23.453537>; this version posted July 23, 2021. The copyright holder for this preprint (which was not certified by peer review) is the author/funder, who has granted bioRxiv a license to display the preprint in perpetuity. It is made available under aCC-BY 4.0 International license.

**B**

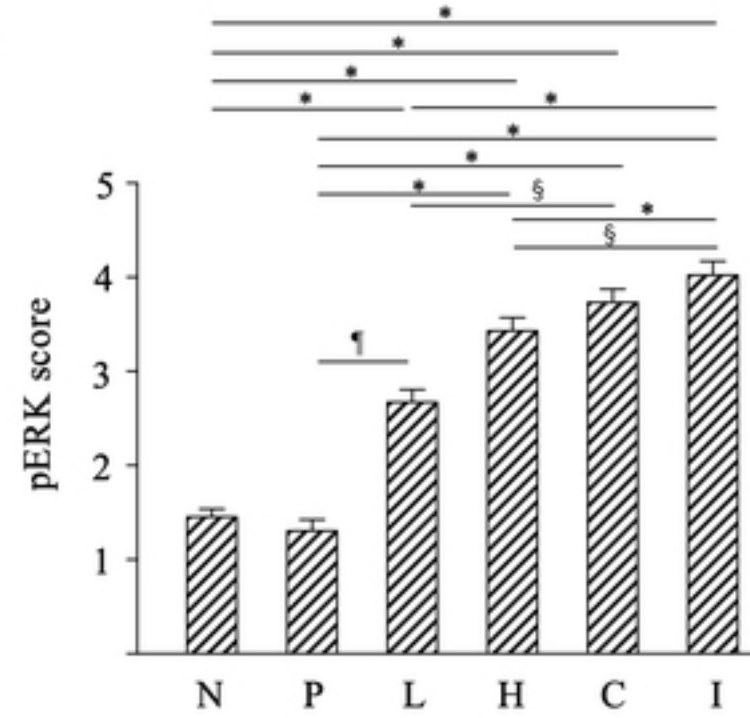



Fig 4

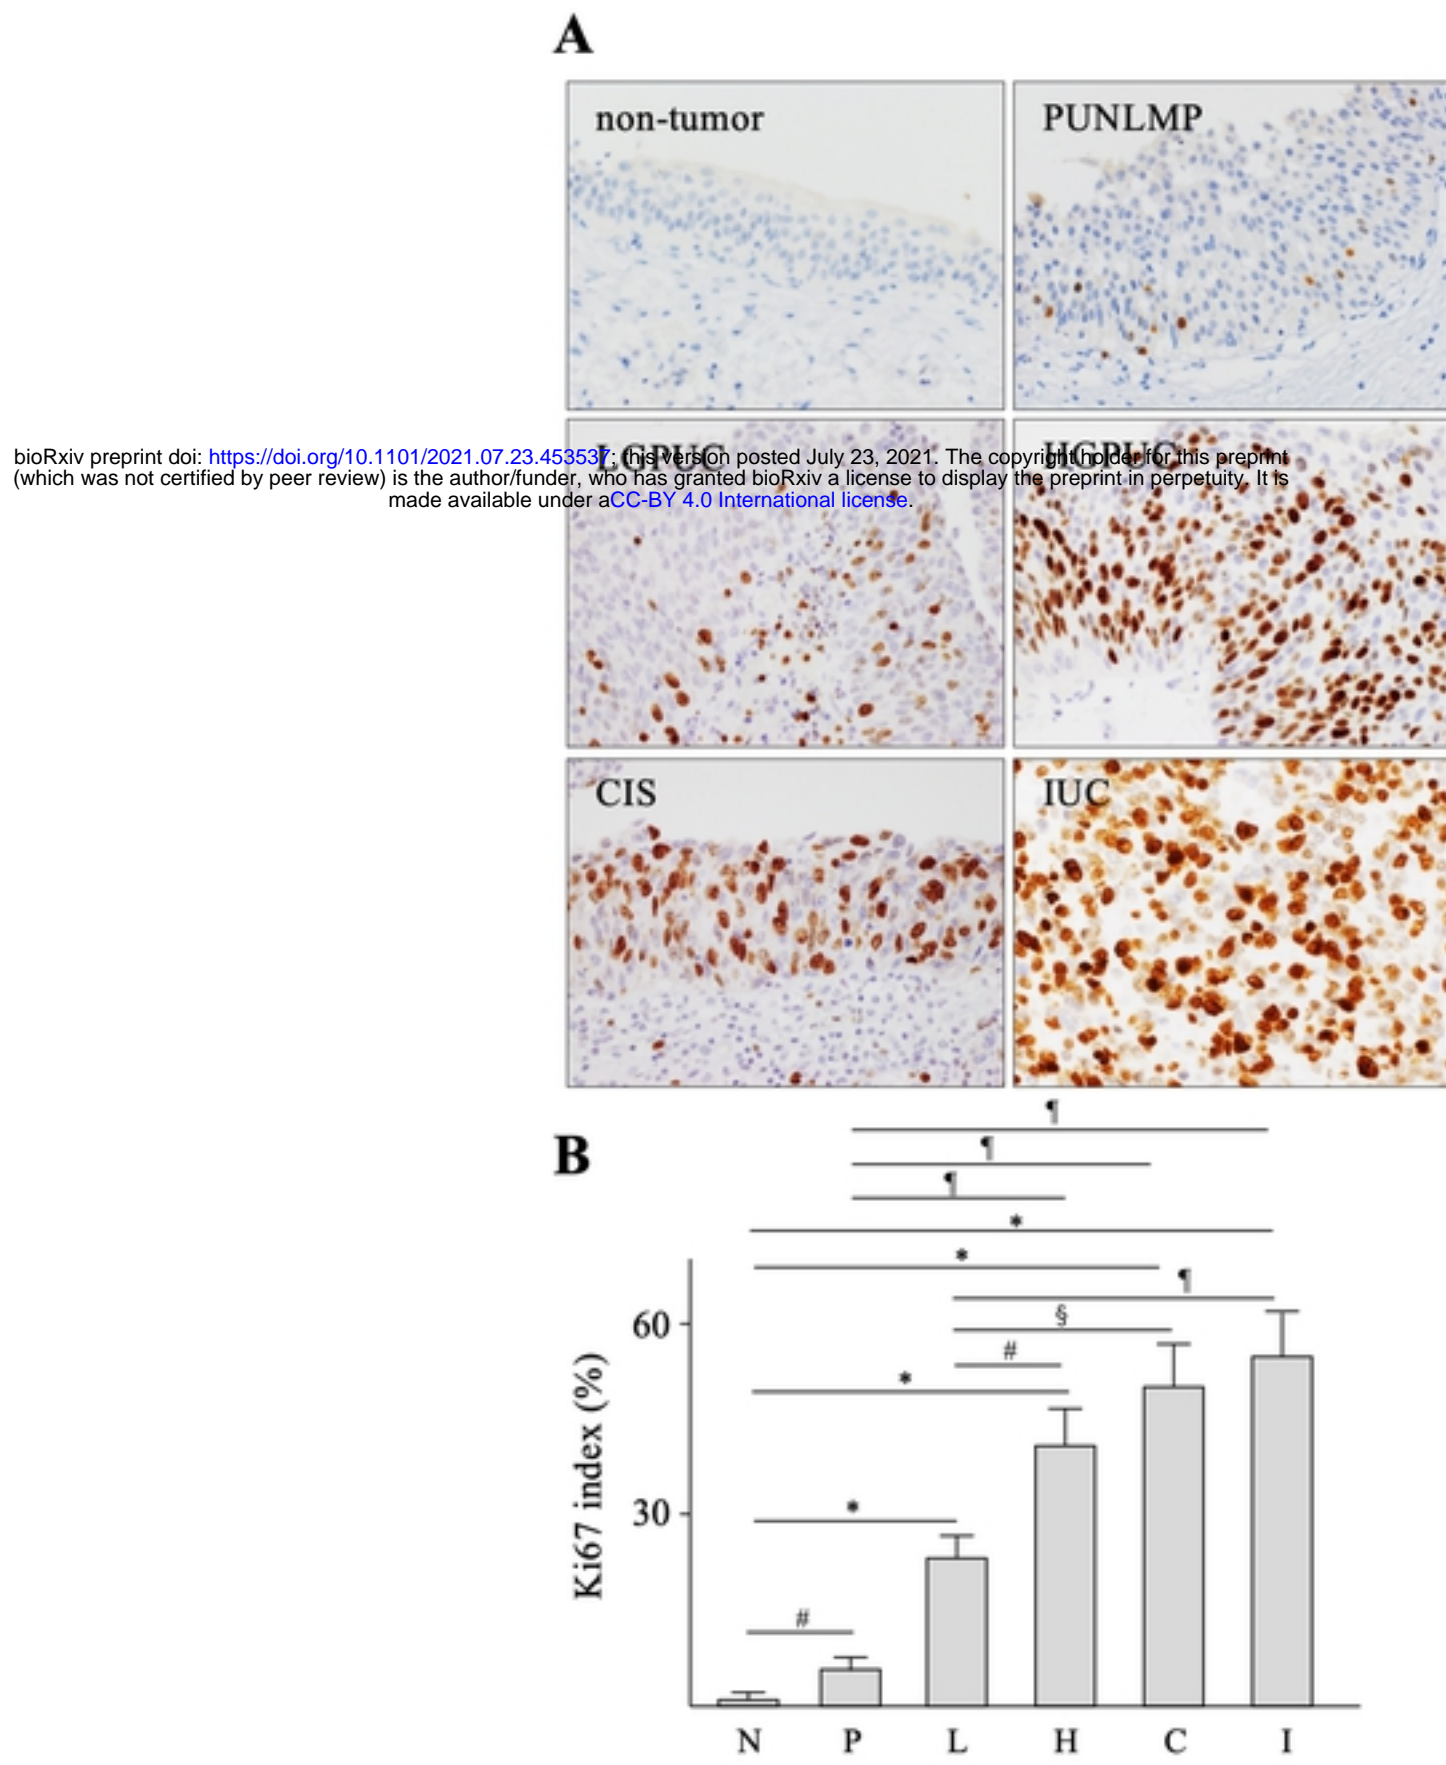

Figure 4

Fig 5

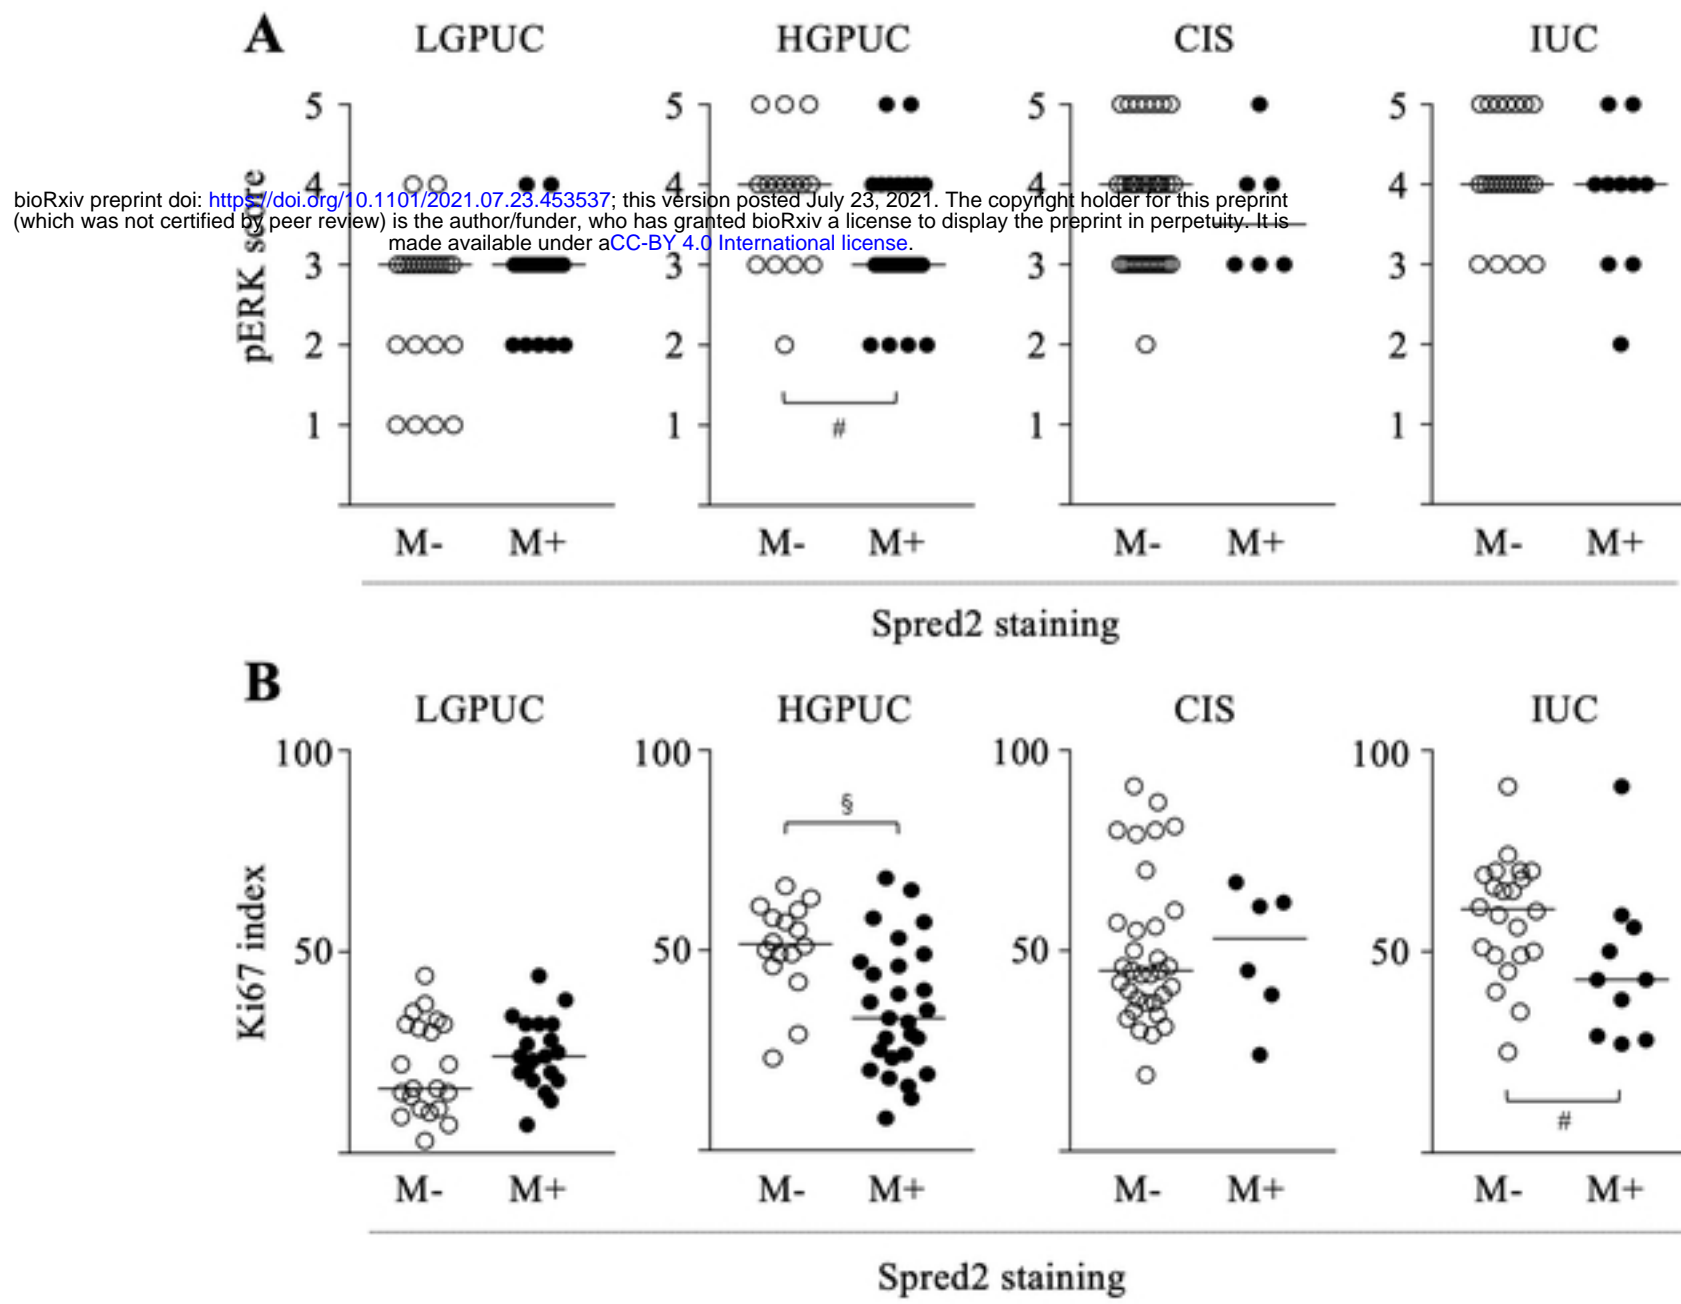

Figure 5

Fig 6

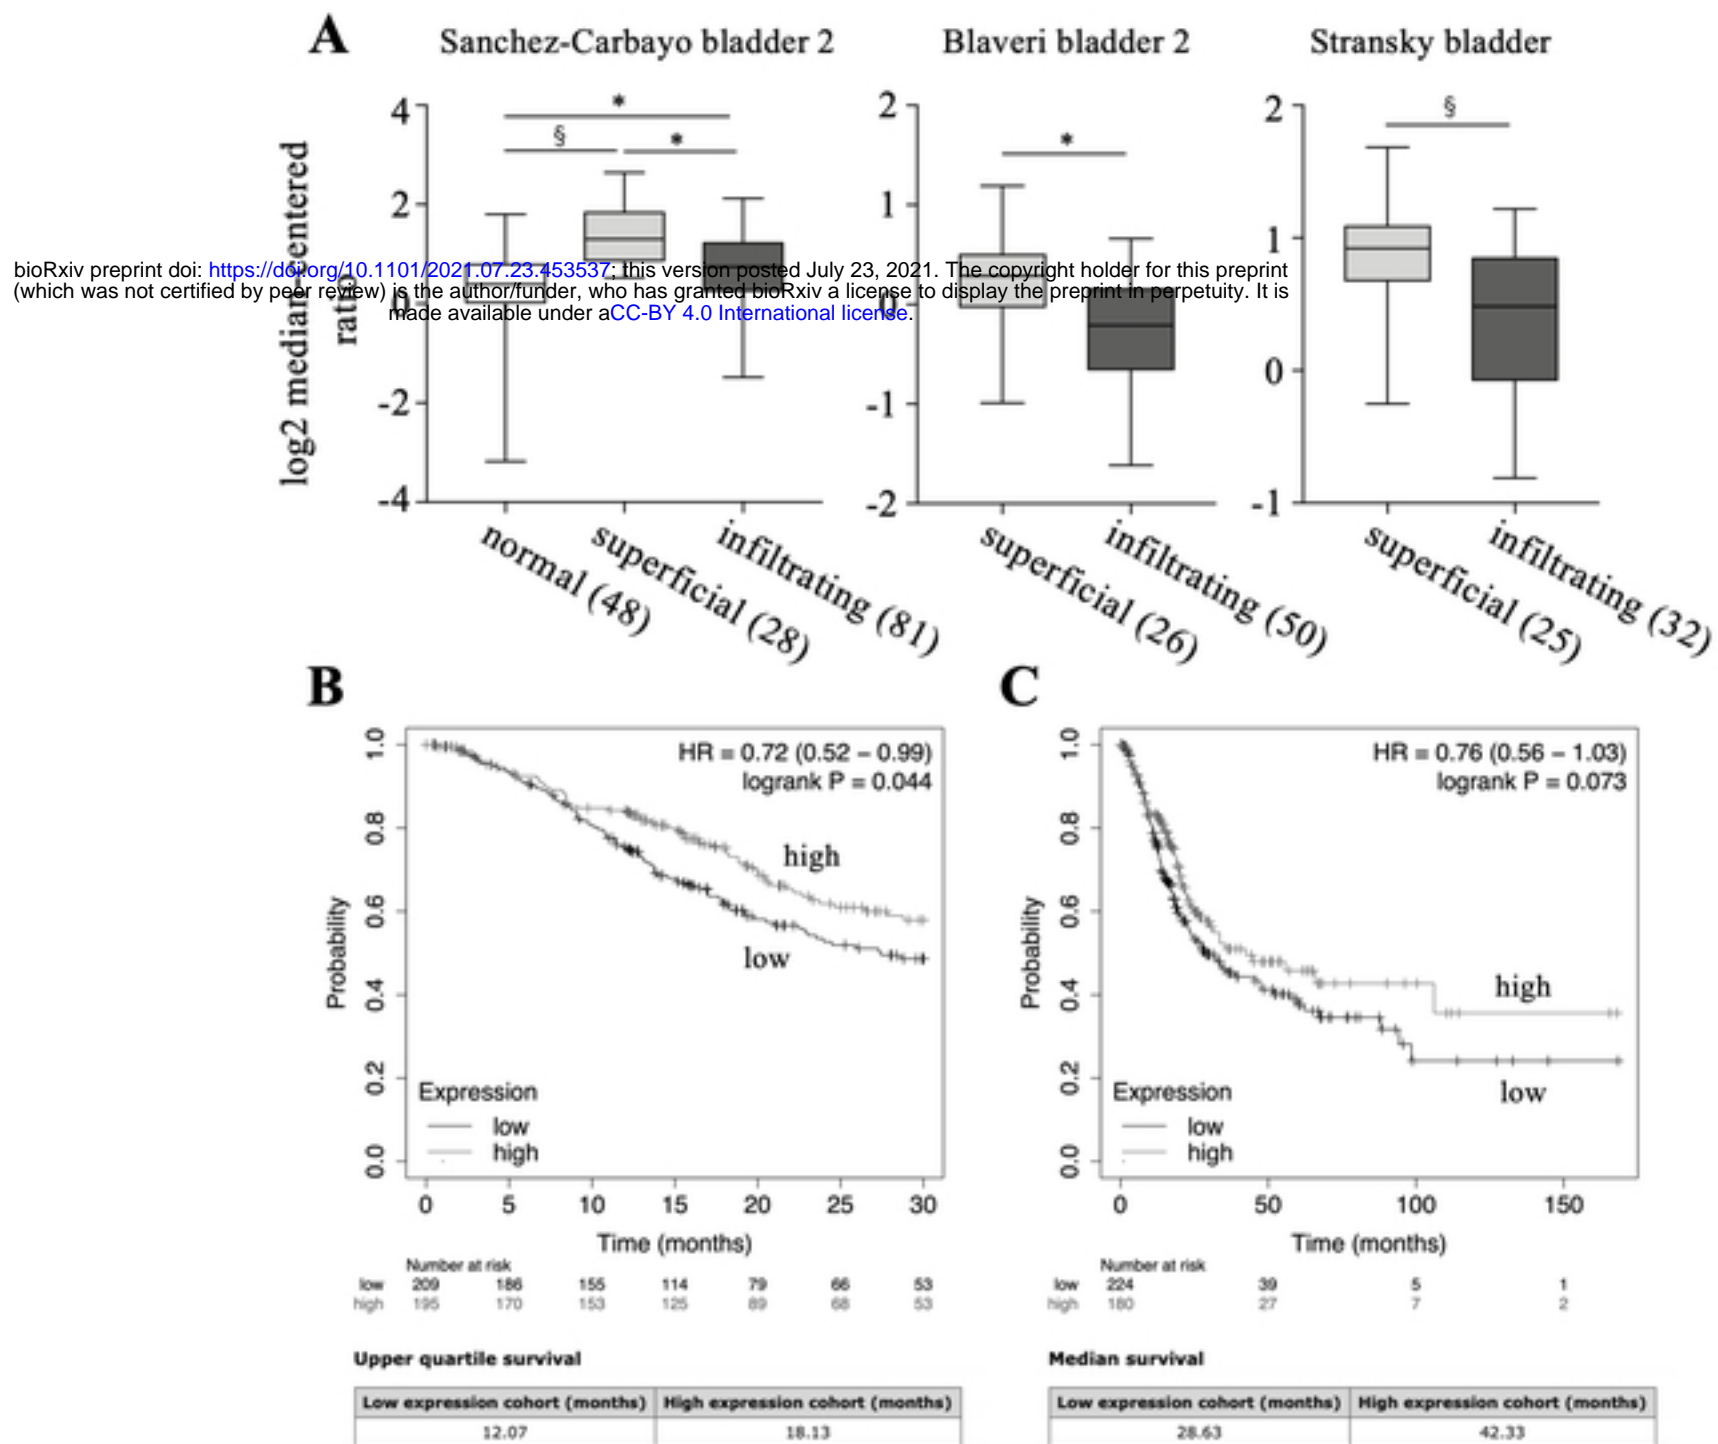

Figure 6
